# Supplementary material
Source: MDPI journal article supplement (https://www.mdpi.com/2199-8531/8/2/65)
Supplement: s1 [file s1]

Archive with 4 entries (4 files):
- Basic Information of Interviewee.pdf
- Collection of Interview Materials.pdf
- Data Quality Analysis.pdf
- General Situations of the Sample.pdf
